# Supplementary material
Source: PubMed Central journal article supplement (PMC7137060)
Supplement: ajtr0012-0950-f5.pdf [file ajtr0012-0950-f5.pdf]

## HAS2-AS1/LSD1/EphB3 promotes NSCLC

**Table S1.** Primers sequences for qRT-PCR and sequences of siRNA, shRNA

|               | Sequences                                                                    |
|---------------|------------------------------------------------------------------------------|
| HAS2-AS1      | forward, 5'-CTTAACCGCGACCCCTGGCGG-3'<br>reverse, 5'-GACCCAGGGTTCAGGAGCAG-3'  |
| EphB3         | forward, 5'-TGGGTAACATCTGAGTTGGCG-3'<br>reverse, 5'-TGGTATGTGCGGATGGGATTC-3' |
| si-HAS2-AS1-1 | 5'-GGTTCAAGCCAGTACACGT-3'                                                    |
| si-HAS2-AS1-2 | 5'-AAAGCAGACCAGCCTGGTCGT-3'                                                  |
| si-HAS2-AS1-3 | 5'-TTTGCACCAGGCCATACGTC-3'                                                   |
| sh-HAS2-AS1   | 5'-AGAAAGCTGTAGCCATTCAAC-3'                                                  |
| sh-LSD1       | 5'-GCCTTGTTGCTTGTCTGCATGT-3'                                                 |
| GAPDH         | forward, 5'-AGAAGGCTGGGGCTCATTTG-3'<br>reverse, 5'-AGGGGCCATCCACAGTCTTC-3'   |
